# Supplementary material for: Functional Exploration of Chaperonin (HSP60/10) Family Genes and their Abiotic Stress-induced Expression Patterns in Sorghum bicolor
Source: PubMed Central journal article supplement — Curr Genomics. 2021 Feb;22(2):137–52. doi: 10.2174/1389202922666210324154336 (PMC8188580; doi:10.2174/1389202922666210324154336), 2021-02
Supplement: CG-22-137_SD1.pdf [file CG-22-137_SD1.pdf]

|            |     |    |    |    |    |    |    |     |   |   |    |    |    |    |    |    |    |   |
|------------|-----|----|----|----|----|----|----|-----|---|---|----|----|----|----|----|----|----|---|
| SbHSP60-1  | 89  | 38 | 9  | 35 | 24 | 5  | 17 | 100 | 3 | 0 | 3  | 6  | 4  | 20 | 2  | 5  | 6  | 1 |
| SbHSP60-2  | 48  | 26 | 8  | 27 | 18 | 1  | 9  | 41  | 2 | 4 | 3  | 5  | 0  | 5  | 5  | 4  | 3  | 0 |
| SbHSP60-3  | 154 | 56 | 16 | 66 | 29 | 8  | 22 | 145 | 4 | 3 | 8  | 17 | 10 | 41 | 7  | 7  | 5  | 5 |
| SbHSP60-4  | 70  | 48 | 17 | 50 | 9  | 4  | 13 | 85  | 3 | 4 | 5  | 4  | 8  | 19 | 13 | 9  | 9  | 4 |
| SbHSP60-5  | 27  | 23 | 5  | 15 | 7  | 0  | 5  | 31  | 2 | 2 | 3  | 5  | 4  | 10 | 2  | 2  | 1  | 0 |
| SbHSP60-6  | 60  | 32 | 12 | 35 | 17 | 1  | 13 | 64  | 2 | 2 | 5  | 1  | 5  | 17 | 4  | 5  | 5  | 2 |
| SbHSP60-7  | 34  | 17 | 4  | 17 | 7  | 1  | 7  | 33  | 1 | 1 | 0  | 3  | 2  | 7  | 1  | 2  | 1  | 0 |
| SbHSP60-8  | 37  | 30 | 6  | 28 | 3  | 1  | 8  | 44  | 1 | 2 | 2  | 2  | 5  | 14 | 6  | 3  | 1  | 2 |
| SbHSP60-9  | 80  | 45 | 10 | 41 | 12 | 4  | 16 | 90  | 4 | 2 | 5  | 6  | 7  | 17 | 7  | 6  | 5  | 7 |
| SbHSP60-10 | 116 | 41 | 14 | 46 | 22 | 3  | 21 | 105 | 4 | 3 | 6  | 8  | 12 | 23 | 6  | 11 | 6  | 6 |
| SbHSP60-11 | 14  | 21 | 3  | 14 | 5  | 0  | 3  | 18  | 0 | 1 | 2  | 0  | 1  | 0  | 1  | 1  | 1  | 2 |
| SbHSP60-12 | 38  | 30 | 2  | 30 | 10 | 5  | 10 | 39  | 1 | 0 | 4  | 5  | 3  | 11 | 1  | 1  | 0  | 2 |
| SbHSP60-13 | 43  | 23 | 0  | 27 | 8  | 4  | 12 | 32  | 0 | 0 | 4  | 3  | 4  | 8  | 2  | 3  | 2  | 4 |
| SbHSP60-14 | 119 | 43 | 11 | 41 | 40 | 2  | 16 | 98  | 2 | 4 | 8  | 9  | 15 | 28 | 5  | 4  | 6  | 4 |
| SbHSP60-15 | 20  | 21 | 10 | 15 | 13 | 0  | 3  | 31  | 2 | 2 | 1  | 4  | 1  | 5  | 0  | 1  | 0  | 0 |
| SbHSP60-16 | 105 | 45 | 6  | 50 | 14 | 2  | 23 | 69  | 0 | 1 | 5  | 10 | 13 | 40 | 1  | 1  | 2  | 1 |
| SbHSP60-17 | 20  | 15 | 3  | 11 | 3  | 0  | 5  | 22  | 0 | 0 | 3  | 3  | 1  | 4  | 2  | 3  | 0  | 0 |
| SbHSP60-18 | 104 | 50 | 18 | 55 | 27 | 3  | 18 | 100 | 2 | 4 | 7  | 9  | 10 | 21 | 2  | 3  | 3  | 3 |
| SbHSP60-19 | 13  | 2  | 1  | 9  | 0  | 0  | 3  | 13  | 0 | 1 | 1  | 0  | 1  | 4  | 0  | 0  | 0  | 1 |
| SbHSP60-20 | 115 | 38 | 13 | 48 | 30 | 4  | 22 | 101 | 1 | 6 | 4  | 9  | 7  | 27 | 4  | 2  | 5  | 3 |
| SbHSP60-21 | 139 | 51 | 20 | 56 | 35 | 5  | 19 | 122 | 0 | 5 | 5  | 16 | 10 | 33 | 11 | 13 | 7  | 4 |
| SbHSP60-22 | 106 | 47 | 17 | 50 | 19 | 6  | 20 | 99  | 0 | 5 | 10 | 9  | 9  | 20 | 15 | 16 | 13 | 5 |
| SbHSP60-23 | 147 | 36 | 16 | 58 | 18 | 6  | 26 | 120 | 2 | 2 | 9  | 8  | 12 | 32 | 8  | 10 | 5  | 2 |
| SbHSP60-24 | 80  | 35 | 21 | 36 | 13 | 0  | 21 | 75  | 2 | 2 | 4  | 2  | 6  | 25 | 3  | 5  | 3  | 3 |
| SbHSP60-25 | 59  | 45 | 8  | 40 | 17 | 2  | 15 | 71  | 2 | 0 | 5  | 5  | 4  | 9  | 3  | 2  | 3  | 2 |
| SbHSP60-26 | 54  | 36 | 7  | 33 | 14 | 4  | 15 | 62  | 2 | 2 | 6  | 3  | 4  | 14 | 0  | 0  | 1  | 0 |
| SbHSP60-27 | 28  | 28 | 10 | 22 | 9  | 2  | 6  | 47  | 2 | 2 | 3  | 3  | 3  | 7  | 1  | 0  | 1  | 0 |
| SbHSP60-28 | 172 | 59 | 28 | 67 | 31 | 13 | 36 | 169 | 4 | 6 | 12 | 14 | 15 | 46 | 17 | 11 | 7  | 2 |
| SbHSP60-29 | 17  | 19 | 5  | 17 | 3  | 0  | 2  | 23  | 1 | 1 | 2  | 2  | 2  | 3  | 1  | 1  | 0  | 2 |
| SbHSP60-30 | 69  | 42 | 16 | 39 | 12 | 5  | 18 | 65  | 4 | 3 | 7  | 5  | 7  | 17 | 6  | 8  | 7  | 3 |
| SbHSP10    |     |    |    |    |    |    |    |     |   |   |    |    |    |    |    |    |    |   |
| SbHSP10-1  | 9   | 1  | 1  | 4  | 2  | 0  | 2  | 4   | 0 | 1 | 1  | 0  | 0  | 3  | 1  | 0  | 0  | 0 |
| SbHSP10-2  | 21  | 2  | 2  | 13 | 0  | 0  | 4  | 13  | 0 | 0 | 0  | 2  | 2  | 5  | 0  | 0  | 0  | 0 |
| SbHSP10-3  | 5   | 5  | 0  | 5  | 1  | 0  | 1  | 5   | 0 | 0 | 1  | 0  | 0  | 0  | 1  | 1  | 0  | 0 |

|           |     |    |    |    |    |   |    |     |   |   |    |    |    |    |    |    |    |   |
|-----------|-----|----|----|----|----|---|----|-----|---|---|----|----|----|----|----|----|----|---|
| SbHSP10-4 | 137 | 67 | 13 | 74 | 26 | 5 | 30 | 135 | 4 | 2 | 14 | 15 | 11 | 19 | 14 | 17 | 10 | 4 |
| SbHSP10-5 | 29  | 20 | 2  | 16 | 3  | 3 | 8  | 30  | 1 | 0 | 2  | 2  | 5  | 6  | 2  | 2  | 2  | 3 |
| SbHSP10-6 | 91  | 60 | 9  | 58 | 12 | 3 | 21 | 96  | 1 | 0 | 5  | 4  | 18 | 25 | 13 | 8  | 6  | 9 |

Table S3. *Cis*-acting elements present in the promoter regions of *Sorghum* HSP60 family

|           | DRE | DPBF | MYB | MYC | HSE | LTRE | GT1GM | ACGTATERD1 | PIBS | BHDIOS | RYREPEAT | CBHV | CAREOSREPI | L-Box | ARR1 | ABRE | GARE | SK <sub>2</sub> | Pollen | WBOXAINPR1 | WBOXHVISI | WBOXNTERF3 | WRKY1 | TKST1 | MARTBOX | SEEMOTIFGM | GTGANTG10 | GTICONSENSUS | GATABOX | ANAEROL | CACTFPPCAL | SORLI2AT | SITEIATCYTC | DOF | SURECORE | ERELEF4 | RHERPATEXPAT7 | ARFAT | CPBCSPOR | Me-Id |
|-----------|-----|------|-----|-----|-----|------|-------|------------|------|--------|----------|------|------------|-------|------|------|------|-----------------|--------|------------|-----------|------------|-------|-------|---------|------------|-----------|--------------|---------|---------|------------|----------|-------------|-----|----------|---------|---------------|-------|----------|-------|
| SbHSP60-1 | 3   | 3    | 13  | 6   | 3   | 1    | 5     | 3          | 0    | 4      | 1        | 3    | 1          | 4     | 17   | 2    | 0    | 3               | 8      | 2          | 4         | 6          | 11    | 4     | 6       | 6          | 11        | 24           | 10      | 6       | 17         | 7        | 2           | 36  | 3        | 2       | 1             | 0     | 2        | 0     |
| SbHSP60-2 | 2   | 1    | 8   | 9   | 2   | 5    | 0     | 8          | 0    | 2      | 0        | 3    | 0          | 0     | 4    | 20   | 0    | 0               | 1      | 0          | 0         | 3          | 10    | 0     | 0       | 0          | 12        | 1            | 3       | 4       | 12         | 28       | 11          | 3   | 1        | 0       | 4             | 0     | 0        | 2     |
| SbHSP60-3 | 0   | 3    | 8   | 3   | 3   | 1    | 5     | 8          | 1    | 5      | 3        | 0    | 0          | 3     | 13   | 7    | 1    | 2               | 7      | 3          | 2         | 3          | 10    | 4     | 3       | 4          | 9         | 14           | 6       | 4       | 22         | 10       | 4           | 22  | 3        | 0       | 3             | 0     | 1        | 0     |
| SbHSP60-4 | 2   | 6    | 14  | 7   | 2   | 5    | 1     | 5          | 0    | 4      | 1        | 5    | 1          | 4     | 20   | 7    | 0    | 1               | 8      | 4          | 1         | 3          | 13    | 5     | 0       | 8          | 17        | 17           | 9       | 7       | 49         | 6        | 2           | 19  | 4        | 0       | 4             | 2     | 1        | 0     |
| SbHSP60-5 | 1   | 0    | 8   | 6   | 5   | 3    | 9     | 0          | 1    | 2      | 3        | 2    | 0          | 3     | 28   | 0    | 0    | 1               | 11     | 2          | 2         | 5          | 9     | 6     | 3       | 4          | 12        | 27           | 12      | 1       | 27         | 7        | 1           | 34  | 0        | 1       | 1             | 1     | 1        | 2     |
| SbHSP60-6 | 0   | 0    | 22  | 10  | 7   | 4    | 7     | 3          | 0    | 7      | 0        | 0    | 1          | 4     | 17   | 7    | 2    | 4               | 16     | 4          | 4         | 6          | 18    | 3     | 1       | 1          | 10        | 18           | 14      | 6       | 38         | 6        | 3           | 23  | 0        | 0       | 2             | 0     | 0        | 2     |
| SbHSP60-7 | 1   | 2    | 15  | 5   | 6   | 2    | 4     | 3          | 1    | 2      | 5        | 2    | 0          | 9     | 21   | 4    | 2    | 1               | 11     | 4          | 3         | 6          | 10    | 3     | 0       | 8          | 4         | 15           | 23      | 5       | 35         | 2        | 1           | 25  | 1        | 1       | 4             | 0     | 4        | 0     |
| SbHSP60   | 2   | 7    | 10  | 8   | 1   | 1    | 4     | 2          | 0    | 5      | 4        | 3    | 1          | 11    | 11   | 2    | 0    | 2               | 5      | 7          | 6         | 15         | 24    | 2     | 3       | 19         | 8         | 16           | 6       | 35      | 2          | 2        | 20          | 5   | 0        | 0       | 2             | 2     | 0        |       |

|                     |   |   |   |   |   |   |   |   |   |   |   |   |   |   |   |   |   |   |   |   |   |   |   |   |   |   |   |   |   |   |   |   |   |   |   |   |   |   |   |   |   |   |   |
|---------------------|---|---|---|---|---|---|---|---|---|---|---|---|---|---|---|---|---|---|---|---|---|---|---|---|---|---|---|---|---|---|---|---|---|---|---|---|---|---|---|---|---|---|---|
| - 8                 | 2 | 4 | 1 | 7 | 2 | 1 | 1 | 5 | 0 | 8 | 0 | 3 | 2 | 1 | 2 | 7 | 0 | 3 | 4 | 6 | 4 | 1 | 2 | 1 | 0 | 5 | 1 | 6 | 1 | 0 | 1 | 8 | 4 | 3 | 1 | 2 | 0 | 0 | 2 | 0 | 3 | 3 |   |
| S b H S P 6 0 - 9   | 2 | 2 | 1 | 5 | 3 | 1 | 2 | 4 | 1 | 5 | 0 | 2 | 1 | 3 | 1 | 4 | 0 | 4 | 6 | 3 | 4 | 8 | 1 | 1 | 2 | 3 | 1 | 1 | 1 | 2 | 5 | 2 | 5 | 2 | 1 | 7 | 3 | 0 | 1 | 1 | 4 | 2 |   |
| S b H S P 6 0 - 1 0 | 0 | 1 | 1 | 9 | 6 | 0 | 3 | 1 | 0 | 7 | 2 | 0 | 0 | 7 | 2 | 1 | 0 | 1 | 9 | 1 | 3 | 8 | 1 | 5 | 1 | 7 | 1 | 1 | 1 | 2 | 2 | 4 | 4 | 1 | 1 | 4 | 0 | 1 | 1 | 0 | 2 | 1 |   |
| S b H S P 6 0 - 1 1 | 6 | 7 | 1 | 1 | 9 | 8 | 2 | 7 | 0 | 1 | 1 | 7 | 1 | 1 | 1 | 2 | 0 | 0 | 1 | 3 | 4 | 8 | 1 | 2 | 1 | 2 | 1 | 9 | 6 | 2 | 2 | 2 | 3 | 8 | 1 | 2 | 0 | 7 | 0 | 3 | 0 |   |   |
| S b H S P 6 0 - 1 2 | 2 | 3 | 1 | 4 | 8 | 2 | 1 | 2 | 3 | 1 | 0 | 7 | 2 | 6 | 6 | 1 | 1 | 9 | 2 | 3 | 6 | 9 | 5 | 0 | 3 | 1 | 0 | 2 | 1 | 3 | 3 | 1 | 1 | 4 | 2 | 2 | 3 | 1 | 0 | 2 | 1 | 0 |   |
| S b H S P 6 0 - 1 3 | 3 | 5 | 1 | 1 | 5 | 3 | 3 | 8 | 1 | 1 | 0 | 2 | 3 | 1 | 1 | 1 | 5 | 4 | 4 | 3 | 9 | 6 | 5 | 1 | 2 | 6 | 3 | 0 | 2 | 1 | 1 | 1 | 2 | 4 | 2 | 5 | 4 | 4 | 1 | 3 | 0 | 0 | 0 |
| S b H S P 6 0 - 1 4 | 1 | 2 | 2 | 1 | 1 | 3 | 6 | 3 | 1 | 3 | 8 | 2 | 1 | 3 | 1 | 3 | 5 | 3 | 4 | 4 | 4 | 9 | 1 | 8 | 3 | 8 | 1 | 1 | 1 | 1 | 2 | 4 | 5 | 2 | 9 | 3 | 0 | 1 | 2 | 4 | 0 |   |   |
| S b H S P 6 0 - 1 5 | 3 | 2 | 1 | 1 | 1 | 3 | 4 | 4 | 0 | 5 | 1 | 3 | 0 | 3 | 2 | 8 | 2 | 2 | 1 | 3 | 3 | 5 | 1 | 4 | 0 | 2 | 2 | 1 | 1 | 9 | 2 | 7 | 2 | 1 | 5 | 1 | 4 | 3 | 1 | 1 |   |   |   |
| S b H S P 6 0 - 1 6 | 4 | 3 | 1 | 9 | 7 | 5 | 6 | 6 | 0 | 6 | 0 | 4 | 0 | 3 | 1 | 8 | 1 | 0 | 1 | 5 | 1 | 3 | 1 | 5 | 1 | 2 | 9 | 1 | 1 | 5 | 2 | 3 | 1 | 2 | 2 | 2 | 1 | 4 | 0 | 0 | 0 |   |   |
| S b H S P 6 0 - 1 7 | 2 | 2 | 2 | 7 | 8 | 5 | 1 | 2 | 1 | 3 | 8 | 1 | 3 | 3 | 2 | 3 | 3 | 2 | 1 | 5 | 0 | 5 | 1 | 7 | 2 | 1 | 8 | 3 | 1 | 8 | 3 | 2 | 2 | 3 | 4 | 4 | 0 | 2 | 0 | 0 | 2 |   |   |



|            |   |   |   |   |   |   |   |   |   |   |   |   |   |   |   |   |   |   |   |   |   |   |   |   |   |   |   |   |   |   |   |   |   |   |   |   |   |   |   |   |   |   |
|------------|---|---|---|---|---|---|---|---|---|---|---|---|---|---|---|---|---|---|---|---|---|---|---|---|---|---|---|---|---|---|---|---|---|---|---|---|---|---|---|---|---|---|
| SbHSP60-28 | 1 | 6 | 1 | 1 | 4 | 0 | 1 | 5 | 0 | 6 | 3 | 0 | 1 | 7 | 1 | 1 | 0 | 1 | 9 | 2 | 3 | 5 | 1 | 2 | 0 | 2 | 2 | 1 | 1 | 3 | 6 | 3 | 3 | 6 | 0 | 1 | 3 | 0 | 1 | 1 | 0 | 1 |
| SbHSP60-29 | 0 | 2 | 8 | 8 | 3 | 1 | 4 | 2 | 0 | 4 | 6 | 1 | 0 | 5 | 3 | 0 | 1 | 1 | 1 | 6 | 3 | 3 | 5 | 1 | 3 | 1 | 1 | 1 | 1 | 5 | 8 | 8 | 3 | 5 | 2 | 1 | 3 | 3 | 0 | 1 | 0 | 2 |
| SbHSP60-30 | 2 | 3 | 1 | 1 | 1 | 2 | 0 | 4 | 0 | 5 | 3 | 1 | 3 | 4 | 1 | 5 | 0 | 1 | 7 | 5 | 6 | 1 | 1 | 1 | 1 | 1 | 2 | 1 | 4 | 1 | 4 | 3 | 7 | 4 | 3 | 1 | 3 | 0 | 3 | 0 | 0 | 0 |
| HSP-10     |   |   |   |   |   |   |   |   |   |   |   |   |   |   |   |   |   |   |   |   |   |   |   |   |   |   |   |   |   |   |   |   |   |   |   |   |   |   |   |   |   |   |
| SbHSP10-1  | 0 | 4 | 1 | 1 | 4 | 1 | 2 | 8 | 1 | 4 | 1 | 1 | 1 | 0 | 1 | 8 | 0 | 2 | 8 | 2 | 3 | 6 | 1 | 2 | 0 | 5 | 1 | 6 | 1 | 6 | 3 | 7 | 2 | 5 | 1 | 4 | 2 | 0 | 0 |   |   |   |
| SbHSP10-2  | 5 | 2 | 1 | 1 | 4 | 2 | 5 | 3 | 1 | 7 | 1 | 4 | 0 | 7 | 1 | 6 | 1 | 5 | 5 | 2 | 3 | 6 | 1 | 3 | 0 | 2 | 1 | 9 | 1 | 4 | 2 | 8 | 2 | 1 | 1 | 1 | 0 | 1 | 1 |   |   |   |
| SbHSP10-3  | 0 | 1 | 1 | 9 | 5 | 0 | 1 | 6 | 1 | 4 | 0 | 1 | 1 | 4 | 1 | 7 | 1 | 3 | 7 | 3 | 3 | 5 | 1 | 3 | 0 | 2 | 1 | 1 | 9 | 2 | 2 | 1 | 4 | 9 | 0 | 0 | 3 | 0 | 4 |   |   |   |
| SbHSP10-4  | 0 | 2 | 2 | 1 | 5 | 0 | 6 | 5 | 0 | 4 | 2 | 0 | 4 | 1 | 1 | 6 | 2 | 1 | 1 | 6 | 6 | 1 | 1 | 8 | 2 | 7 | 1 | 2 | 2 | 2 | 1 | 3 | 2 | 2 | 7 | 3 | 0 | 1 | 0 | 1 |   |   |
| SbHSP10-5  | 0 | 1 | 1 | 1 | 5 | 1 | 3 | 3 | 1 | 8 | 1 | 0 | 0 | 1 | 9 | 0 | 0 | 2 | 6 | 3 | 1 | 2 | 1 | 4 | 0 | 6 | 1 | 1 | 2 | 1 | 3 | 3 | 0 | 3 | 1 | 1 | 3 | 0 | 0 |   |   |   |
| SbHSP10-6  | 4 | 3 | 9 | 4 | 1 | 4 | 1 | 4 | 0 | 4 | 1 | 0 | 4 | 1 | 0 | 5 | 7 | 0 | 2 | 2 | 1 | 4 | 4 | 1 | 2 | 0 | 4 | 1 | 4 | 3 | 4 | 2 | 1 | 3 | 2 | 7 | 5 | 0 | 5 | 2 | 0 |   |

**Table. S5 Non-synonymous to synonymous substitution rates (dN/dS) of SbHSP60 paralogs**

| SbHSP60 Gene 1 | Chr | SbHSP60 Gene 2 | Chr | No. of non-synonymous sites (N) | No. of synonymous sites (S) | Non-synonymous substitution rate ( $d_N$ ) | Synonymous substitution rate ( $d_S$ ) | $d_N/d_S$ | Mya   |
|----------------|-----|----------------|-----|---------------------------------|-----------------------------|--------------------------------------------|----------------------------------------|-----------|-------|
| SbHSP60-01     | 1   | SbHSP60-25     | 9   | 2811.4                          | 680.6                       | 7.7152                                     | 0.0779                                 | 99.0000   | 5.99  |
| SbHSP60-03     | 1   | SbHSP60-14     | 7   | 4551.8                          | 881.2                       | 6.4569                                     | 0.0652                                 | 99.0000   | 5.01  |
| SbHSP60-04     | 1   | SbHSP60-16     | 4   | 4313.6                          | 1017.4                      | 9.3073                                     | 0.0940                                 | 99.0000   | 7.23  |
| SbHSP60-05     | 1   | SbHSP60-30     | u   | 1691.6                          | 372.4                       | 6.4812                                     | 0.0655                                 | 99.0000   | 5.03  |
| SbHSP60-06     | 1   | SbHSP60-18     | 5   | 2939.3                          | 600.7                       | 5.9845                                     | 0.0604                                 | 99.0000   | 4.64  |
| SbHSP60-08     | 2   | SbHSP60-29     | 10  | 1304.8                          | 354.2                       | 1.5741                                     | 1.3860                                 | 1.1357    | 10.66 |
| SbHSP60-10     | 2   | SbHSP60-22     | 7   | 3214.8                          | 640.2                       | 6.5080                                     | 0.0657                                 | 99.0000   | 5.05  |
| SbHSP60-12     | 3   | SbHSP60-13     | 3   | 1884.1                          | 440.9                       | 6.5614                                     | 0.0663                                 | 99.0000   | 5.1   |
| SbHSP60-19     | 5   | SbHSP60-26     | 9   | 353.3                           | 93.7                        | 6.0015                                     | 0.0606                                 | 99.0000   | 4.66  |
| SbHSP60-20     | 6   | SbHSP60-21     | 7   | 3964.3                          | 718.7                       | 7.2582                                     | 0.0733                                 | 99.0000   | 5.63  |
| SbHSP10-1      | 1   | SbHSP10-06     | 10  | 303.1                           | 98.9                        | 17.1868                                    | 0.1736                                 | 99.0000   | 13.35 |
| SbHSP10-2      | 1   | SbHSP10-3      | 2   | 395.0                           | 88.0                        | 2.7957                                     | 6.1591                                 | 0.4539    | 47.37 |

( $d_N/d_S > 1$  = Positive or Darwinian Selection (Driving Change);  $d_N/d_S < 1$  = Purifying or Stabilizing Selection (Acting against change);  $d_N/d_S = 1$  Neutral Selection)

**Table S6. Non-synonymous to synonymous substitutions of HSP60 orthologs of *Sorghum*, *Oryza* and *Arabidopsis***

| Sb60 Gene   | Chr | Ortholog     | Chr | No. non Synonymous sites (N) | No. Synonymous sites (S) | Non Synonymous substitution rate ( $d_N$ ) | Synonymous substitution rate ( $d_S$ ) | $d_N / d_S$ | Mya   |
|-------------|-----|--------------|-----|------------------------------|--------------------------|--------------------------------------------|----------------------------------------|-------------|-------|
| Sb02g024300 | 2   | Os09g23740   | 12  | 3051.2                       | 803.8                    | 3.2149                                     | 2.4773                                 | 1.2978      | 19.05 |
| Sb07g020930 | 7   | Os08g33200   | 8   | 3719.7                       | 939.3                    | 3.4622                                     | 2.9442                                 | 1.1759      | 22.64 |
| Sb10g009370 | 10  | Os06g14750   | 6   | 3621.3                       | 1205.7                   | 7.8677                                     | 1.9410                                 | 4.0534      | 14.93 |
| Sb07g022110 | 7   | Os08g34950   | 8   | 4518.3                       | 914.7                    | 5.8990                                     | 0.0596                                 | 99.0000     | 4.58  |
| Sb03g041400 | 3   | Os12g13440   | 12  | 4155.8                       | 701.2                    | 6.4122                                     | 0.0648                                 | 99.0000     | 4.98  |
| Sb06g034080 | 6   | Os04g59540   | 4   | 3485.0                       | 637.0                    | 8.3735                                     | 0.0846                                 | 99.0000     | 6.50  |
| Sb01g028650 | 1   | Os10g41710   | 10  | 295.3                        | 106.7                    | 12.3425                                    | 14.8203                                | 0.8328      | 114.0 |
| Sb10g006450 | 10  | Os06g09679   | 6   | 648.5                        | 182.5                    | 16.6103                                    | 0.1678                                 | 99.0000     | 12.90 |
| Sb04g035040 | 4   | Os02g54060   | 2   | 585.1                        | 179.9                    | 1.5289                                     | 2.2074                                 | 0.6926      | 16.98 |
| Sb02g025700 | 2   | Os09g26730   | 9   | 570.7                        | 164.3                    | 16.6950                                    | 0.1686                                 | 99.0000     | 12.96 |
| Sb02g011260 | 2   | Os09g38980   | 9   | 587.6                        | 147.4                    | 6.0110                                     | 0.0607                                 | 99.0000     | 78.91 |
| Sb01g000380 | 1   | Os03g64210   | 3   | 1359.3                       | 392.7                    | 10.7306                                    | 0.1084                                 | 99.0000     | 8.33  |
| Sb09g014430 | 9   | Os12g17910   | 12  | 1369.0                       | 365.0                    | 7.1946                                     | 0.0727                                 | 99.0000     | 5.59  |
| Sb04g000370 | 4   | Os02g01280   | 2   | 1401.8                       | 326.2                    | 15.9874                                    | 0.1615                                 | 99.0000     | 12.42 |
| Sb01g041170 | 1   | Os04g0443900 | 4   | 1373.2                       | 390.8                    | 14.4551                                    | 7.8874                                 | 1.8327      | 60.67 |
| Sb09g026970 | 9   | Os05g0540300 | 5   | 1395.9                       | 347.1                    | 3.9401                                     | 0.1431                                 | 27.5367     | 11.0  |
| Sb01g043220 | 1   | Os06g34690   | 6   | 1251.0                       | 423.0                    | 4.8892                                     | 2.4069                                 | 2.0314      | 18.51 |
| Sb04g004030 | 4   | Os06g47320   | 6   | 1297.8                       | 370.2                    | 0.3544                                     | 0.3348                                 | 1.0558      | 25.75 |
| Sb05g022470 | 5   | Os11g36950   | 3   | 344.5                        | 78.5                     | 8.9983                                     | 0.0909                                 | 99.0000     | 6.99  |
| Sb02g043440 | 2   | Os05g0147400 | 5   | 1310.6                       | 294.4                    | 8.4378                                     | 0.0852                                 | 99.0000     | 6.55  |

|             |   |            |    |        |       |         |         |         |       |
|-------------|---|------------|----|--------|-------|---------|---------|---------|-------|
| Sb01g034530 | 1 | Os03g25050 | 3  | 302.8  | 105.2 | 11.2831 | 10.3233 | 1.0930  | 79.41 |
| Sb01g028650 | 1 | Os10g41710 | 10 | 310.5  | 91.5  | 7.8735  | 0.0795  | 99.0000 | 6.11  |
| Sb07g000590 | 7 | Os08g01390 | 8  | 4089.6 | 740.4 | 6.7712  | 0.0684  | 99.0000 | 5.26  |

( $d_N/d_S > 1$  = Positive or Darwinian Selection (Driving Change);  $d_N/d_S < 1$  = Purifying or Stabilizing Selection (Acting against change);  $d_N/d_S = 1$  Neutral Selection)

**Table S7. qRT-PCR expression levels of SbHSP60s**

| Tissue / Stress | Name of the gene and their expression |           |           |           |           |            |           |           |
|-----------------|---------------------------------------|-----------|-----------|-----------|-----------|------------|-----------|-----------|
|                 | SbHSP60-1                             | SbHSP60-2 | SbHSP60-3 | SbHSP60-6 | SbHSP60-9 | SbHSP60-24 | SbHSP10-2 | SbHSP10-5 |
| R               | 0.32                                  | 0.01      | 0.15      | 0.10      | -0.26     | 0.09       | 0.10      | -0.60     |
| S               | -0.40                                 | -0.46     | -0.79     | -0.72     | -0.99     | -0.45      | -0.32     | -0.74     |
| L               | 0.08                                  | 0.45      | 0.65      | 0.62      | 1.25      | 0.35       | 0.22      | 1.35      |
| DR              | 2.38943                               | 2.229417  | 4.046477  | 0.8625422 | 5.924390  | 1.289370   | 5.96559   | 3.96320   |
| SR              | 2.92817                               | 1.558329  | 14.32040  | 47.176614 | 10.05610  | 0.624165   | 1.53687   | 0.59460   |
| HR              | 6.68070                               | 2.013911  | 29.24260  | 0.4263174 | 0.562529  | 1.547564   | 5.81589   | 0.04450   |
| CR              | 0.11907                               | 0.141610  | 0.336808  | 9.4479412 | 9.986644  | 18.63573   | 0.14161   | 0.01991   |
| DS              | 0.25173                               | 0.130308  | 0.517632  | 4.1698630 | 17.63048  | 3.249009   | 0.05041   | 0.05440   |
| SS              | 7.74536                               | 2.815387  | 2.060984  | 2.1189261 | 2.874544  | 2.663518   | 11.6586   | 0.03025   |
| HS              | 0.18258                               | 0.244289  | 0.307075  | 23.862390 | 18.33675  | 12.35194   | 0.06149   | 0.24092   |
| CS              | 0.43931                               | 0.374576  | 1.397969  | 1.5619338 | 224.9301  | 82.32925   | 0.64319   | 30.5549   |
| DL              | 12.6699                               | 0.656712  | 3.792984  | 1.1276609 | 3.348078  | 71.67178   | 0.96817   | 0.01154   |
| SL              | 1.32256                               | 1.594753  | 19.07132  | 1.1674278 | 16.03701  | 0.529731   | 0.58777   | 0.42435   |
| HL              | 0.18772                               | 0.103425  | 3.131093  | 0.0527994 | 1.236846  | 0.010284   | 0.49197   | 0.71532   |
| CL              | 4.73489                               | 1.208597  | 23.97291  | 0.1177120 | 5.910717  | 0.187288   | 100.659   | 3.79298   |

(R; Root, S: Stem, L: Leaf, D: Drought, S: Salt, H: Heat, C: Cold)





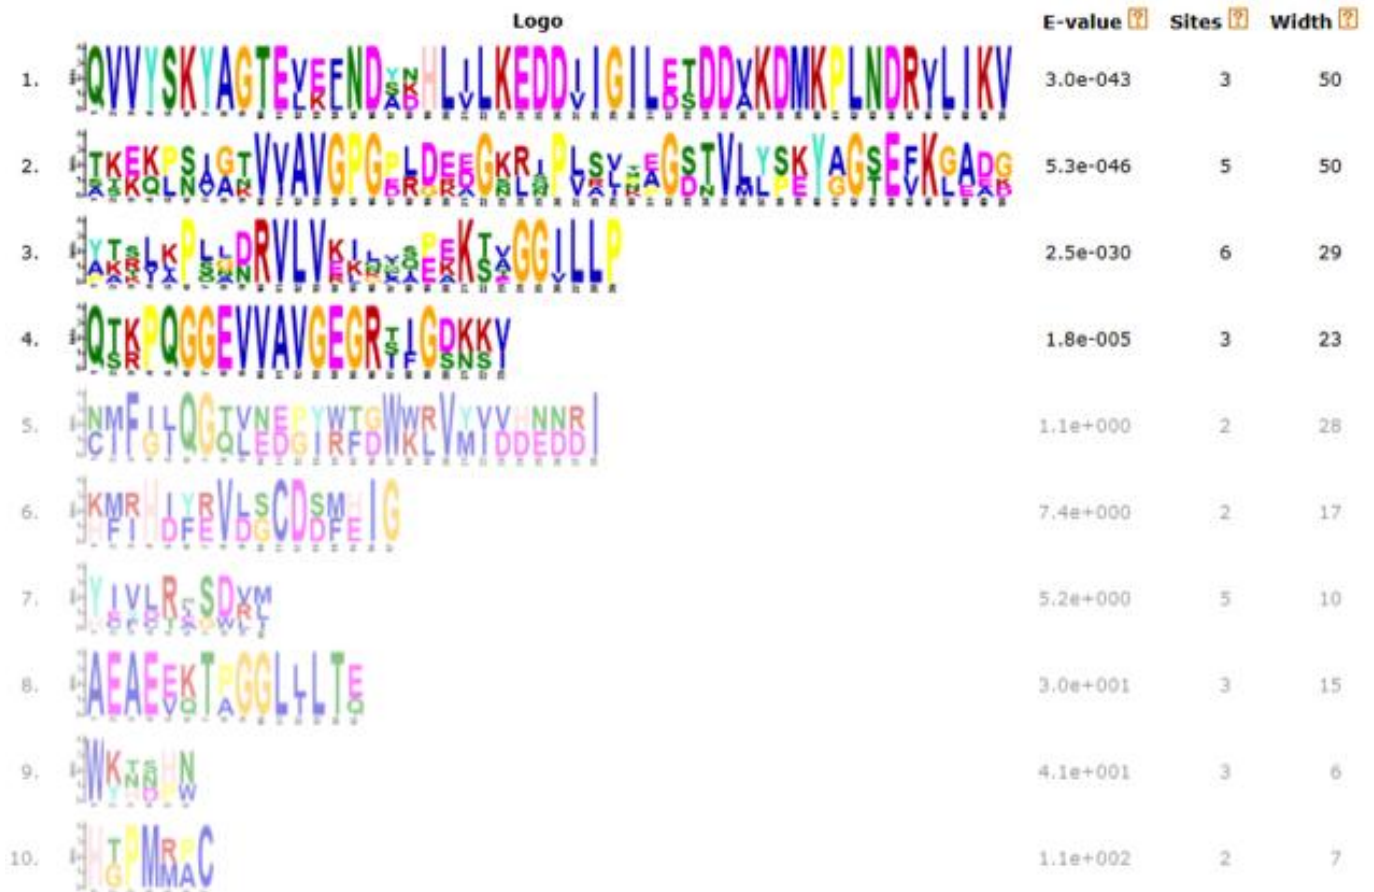

Fig S2. MEME identified motif sequences of *Sorghum* Hsp10 proteins

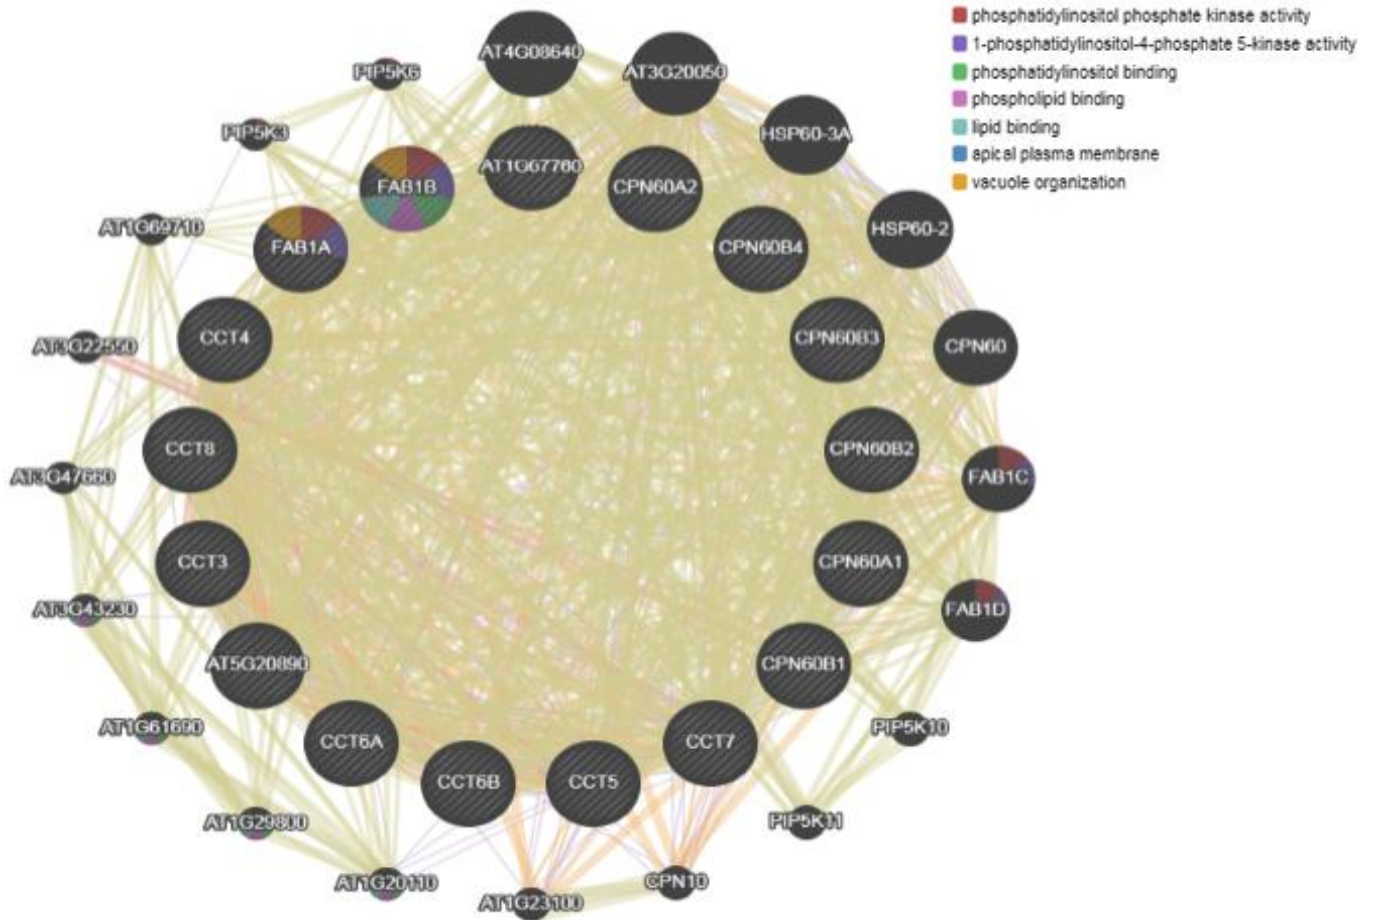

Fig S3. Gene-gene interaction and GO annotation analysis of SbHSP60s



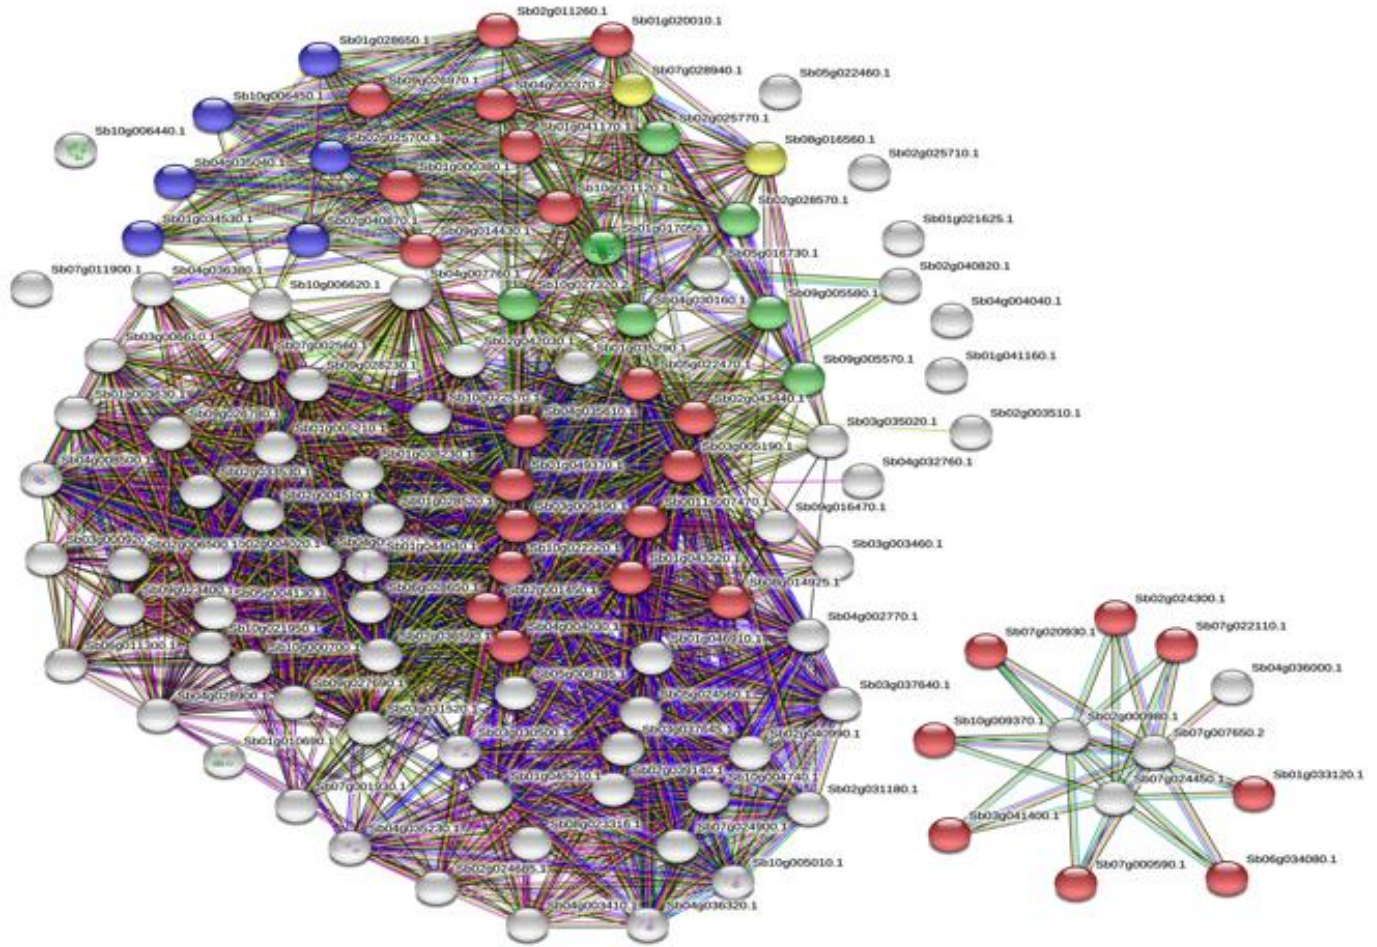

Fig S4. STRING identified protein – protein interactions of Hsp60 in *Sorghum*

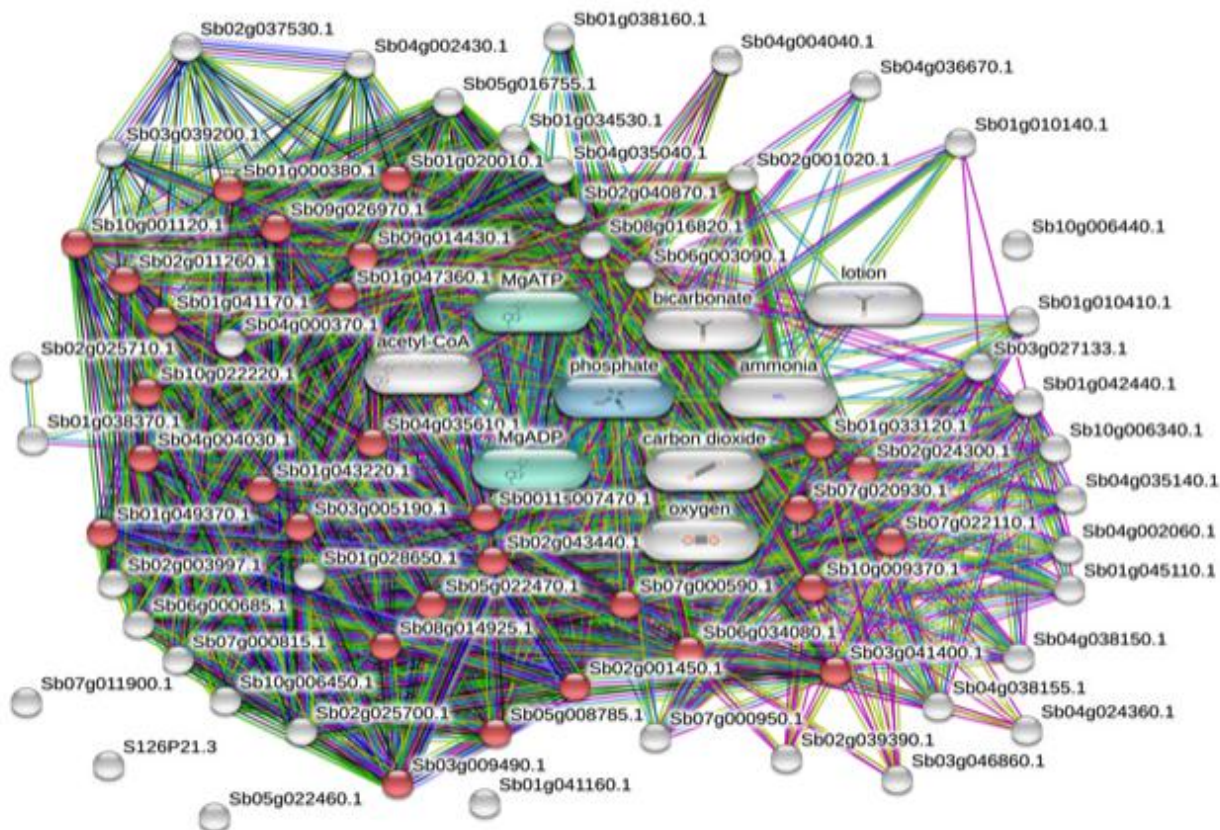

Fig S5. Protein – chemical interaction network of of SbHsp60s

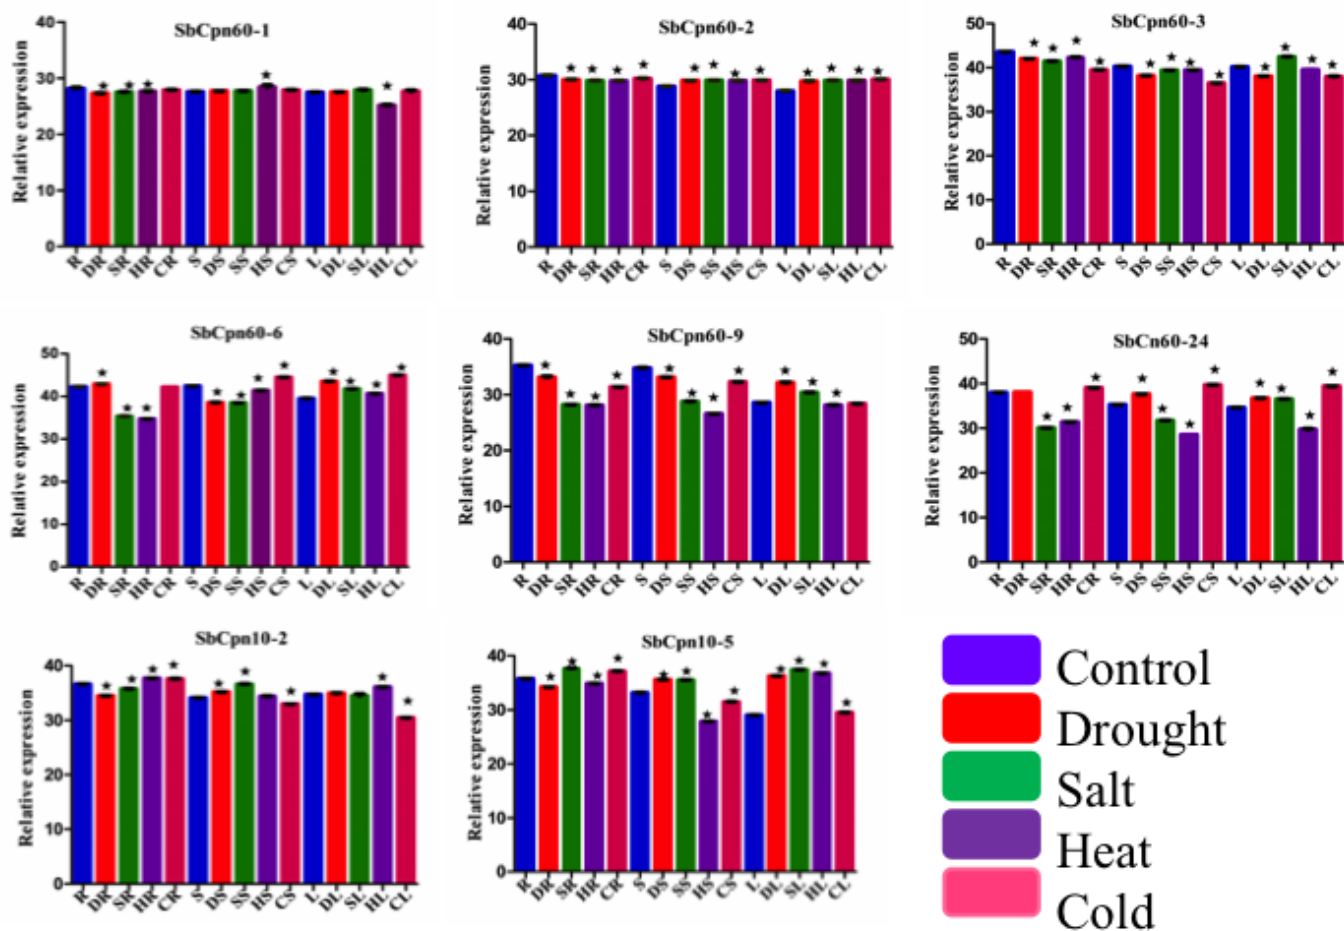

**Fig. S6** The qRT-PCR relative expression values of selected *SbHsp60* genes in root, stem, and leaves under drought, salt, heat and cold stress (DR: Drought root, DS: Drought stem, DL: Drought Leaf, SR: Salt root, SS: Salt stem, SL: Salt leaf, HR: Heat root, HS: Heat stem, HL: Heat leaf, CR: Cold root, CS: Cold stem, CL: Cold leaf). Each values represents mean  $\pm$  SD of three replicates. \* indicate significant differences calculated by t-test ( $P \leq 0.05$ ).
